# Supplementary material for: Diagnostic value of Ep300 and FOXO4 proteins in acute ischemic stroke: preliminary findings from a case-control study
Source: PeerJ. 2025 Aug 29;13:e19970. doi: 10.7717/peerj.19970 (PMC12401024; doi:10.7717/peerj.19970)
Supplement: Supplemental Information 1 [file peerj-13-19970-s001.xlsx]

## Sheet: Sayfa1
No:	Age	Gender, 1: female, 2: male	Date	Date/ hour	The time between the onset of complaints and arrival at the emergency department	Fever	Pulse	Systolic BP	Diastolic BP	Respiration rate	Diabetes	Hypertension	Cerebrovascular Disease	Congestive Heart Failure	Coronary Artery Disease	Chronic Kidney Disease	OTHER	Glucose	Hemoglobin	platelet	wbc	ast	alt	bun	Creatine	Sodium	Potassium	Chlor	Calcium	ECG, 1: AF, 2: NSR	ep300	foxo-4	hemiparesis	Altered mental status	speech disturbance	syncope	imbalance	facial asymmetry	diplopia	infarct volume cm3
1	74	1	2023-03-02	11:35:00	60	36	78	115	77	18			1	1	1			103	12.8	482	12.38	29.4	17.4	21.2	0.9	130	4.52	91.3	8.78	1	332.794	1.14894		1	1					14.96
2	53	2	2023-04-09	17:00:00	120	36.5	100	130	80	22	1	1	1					100	14	326	10	19	16	10	0.7	136	4.49	80	9.91	2	515.569	1.38483			1					12.6
3	76	2	2023-02-02	00:46:00	135	36	79	122	74	14		1					1	252	14.9	251	8.46	30	36	15.9	1.39	133	4.11	95	9.13	2	332.966	1.49377	1							33.6
4	50	2	2023-02-27	11:53:00	720	36	85	130	72	15			1				1	154	15.6	308	5.65	38.8	55.2	8.44	1.02	137.1	4.81	106.7	9.48	2	430.455	1.07954			1					12.8
5	61	2	2023-02-01	19:13:00	40	36	85	129	65	17		1			1		1	141	13.4	199	13.4	17	15	15.4	0.94	142	4.36	106	8.67	3	505.126	1.49681			1	1				40
6	30	1	2023-02-25	20:38:00	45	36	85	130	72	15							1	113	9.7	246	14.14	16	11	9.3	0.74	137	3.84	99	8.28	1	1847.87	8.65533	1	1						56
7	78	2	2023-04-15	18:50:00	120	36	75	135	65	20	1	1					1	140	11.6	267	6.68	25	14	18	0.96	139	4.88	106	9.41	2	556.646	1.89505				1	1			14
8	84	1	2023-02-26	17:16:00	30	36	88	130	77	16		1					1	125	12.1	216	6.7	25.1	5.81	18.6	0.76	139.8	4.14	104.1	9.85	1	235.425	1.23644	1							30
9	65	2	2023-04-15	07:20:00	120	36.5	100	130	70	22	1	1					1	102	11.8	539	27.4	301	26	10	0.85	138	4.25	100	8.63	2	426	1.85012	1					1		49
10	64	1	2023-03-13	15:05:00	300	36	88	136	78	16							1	74	8.9	310	8.64	18.9	7.69	23.01	2.2	133.3	4.15	97.4	7.82	2	584.483	2.70885				1				27.2
11	69	2	2023-03-28	15:33:00	1440	37.1	100	130	80	22	1	1					1	280	7.6	981	15	15	15	27	1.17	128	5.83	98	8.43	2	337.969	0.171273	1	1						5.8
12	80	1	2023-02-02	02:00:00	60	36	78	129	65	16		1					1	153	14.2	265	12.4	13	10	22.6	0.82	137	4.04	99	9.05	2	364.317	1.61628	1		1					1.2
13	82	2	2023-02-01	08:23:00	1440	36	135	79	17	16							1	188	12.7	78	64.97	103	21.6	19.4	0.86	137.7	3.8	101.6	8.9	2	298.788	0.834794	1							17.2
14	75	1	2023-01-12	00:00:00	30	36	90	160	102	28	1	1			1			215	12.6	344	13.41	14	11	15.9	0.73	132	5.38	96	9.75	2	242.271	0.964329			1					3
15	73	1	2023-01-14	20:11:00	480	36.7	88	123	67	18	1	1					1	236	7.4	482	11.65	30	15.5	17	0.84	135.4	4.4	100.3	9.36	2	775.185	2.58834		1	1					31.2
16	61	2	2023-03-16	10:48:00	840	36	85	129	70	17	1						1	256	17.7	307	11.65	19.8	14.1	13.9	0.83	135.4	4.7	99.8	9.58	2	205.447	0.447318					1		1	4.32
17	73	1	2023-01-12	12:30:00	30	36	61	157	111	26		1					1	120	10.4	330	8.58	18	10.7	16.8	0.89	136.3	4.23	102.4	9.1	2	382.191	2.13102	1		1					1.8
18	77	2	2023-01-11	09:30:00	45	36	74	157	70	20		1					1	104	14.7	181	8.08	22.1	4.45	20.2	1.2	135.5	4.64	104.2	9.19	2	357.379	1.42198						1		1.98
19	47	2	2023-01-24	04:47:00	75	36	75	123	78	16		1					1	281	10.2	423	7.8	15	11	17.4	0.8	136	4.74	97	8.9	2	392.861	1.30382	1							4.32
20	58	2	2023-03-21	07:48:00	480	36.7	93	100	79	19	1					1	1	75	9.6	225	12.68	46.2	36.5	78.3	10	134.8	5.38	104.6	6.78	2	389.759	1.26798		1	1					1.8
21	58	1	2023-03-23	12:00:00	60	36	88	123	77	18					1	1	1	85	9.1	253	2.95	24.2	14.4	20.7	0.87	138.6	4.02	107.6	9.03	2	378.393	1.05587	1							1.6
22	61	1	2021-01-15	13:31:00	150	36.8	71	124	78	19	1	1					1	263	14.8	320	8.51	18	13	15.3	0.74	138	4.37	103	9.56	2	582.124	1.39165	1							2.1
23	66	1	2022-12-28	15:19:00	15	36	57	201	116	23	1						1	115	15,8	192	6540	23,2	13,5	18,4	0,75	139	3,1	102,7	10	2	1146.57	4.48275		1						1.54
24	63	2	2022-12-28	15:04:00	60	36,5	84	140	80	24	1	1			1			195	14,1	352	15750	40	16,7	21,,1	1,13	136,7	4,14	95,3	10,5	2	495.038	1.27347	1							2.8
25	56	2	2023-01-25	13:40:00	380	36,3	90	97	47	20		1	1				1	94	14,7	353	11370	36	19	15	0,87	135	3,5	120	9,31	2	364.326	1.86821	1							1.76
26	59	2	2023-03-09	10:00:00	300	36.5	60	140	80	22			1				1	120	15,5	272	6500	22	22	16	0,93	139	3,7	103	9	2	434.307	1.82622	1		1					1.4
27	69	2	2023-03-28	15:33:00	60	37,1	100	130	80	22	1	1					1	280	7,6	981	15000	15	15	27	1,17	128	5,83	98	8,43	2	337.969	0.171273	1	1						4.84
28	63	2	2023-04-11	01:25:00	960	36.3	95	155	95	18							1	88	12.8	152	6.05	39	23	7.7	0.55	137	4.05	114	7.2	2	361.564	1.12371	1							6
29	63	2	2023-04-28	17:00:00	120	36.2	79	190	113	18		1					1	145	12.3	250	8.6	43	51	19	1.1	135	3.6	105	8.6	2	347.791	1.73616			1		1			4.2
30	67	2	2023-04-19	12:20:00	1440	37.3	85	150	95	18		1					1	135	13.3	236	21.2	35	45	23	0.8	138	3.7	117	7.8	2	330.714	1.24926	1		1					4
31	76	2	2023-03-25	14:00:00	120	37.8	108	110	50	22							1	120	14.8	223	10.05	24	17	14	0.9	142	3.8	105	8.1	2	256.84	1.68486					1			15.4
32	78	1	2023-04-28	11:30:00	408	36.1	95	135	85	17	1	1				1		90	12.1	228	17.9	34	17	74	5.4	135	8.3	110	8.4	2	307.491	1.22491		1						29.64
33	79	1	2023-03-14	16:00:00	1440	36,2	80	130	80	20		1					1	104	14.7	181	8.08	22.1	4.45	20.2	1.2	135.5	4.64	104.2	9.19	2	479.508	1.49468					1			4.16
34	79	1	2023-03-14	22:20:00	55	36.2	98	131	69	19					1		1	113	12.3	243	12.1	28	36	21	0.9	132	3.5	112	7.2	2	952.797	3.36727				1				48
35	58	2	2023-01-04	16:19:00	1440	36.1	83	127	75	18		1					1	110	14.7	214	7880	22	29.1	25.4	1.07	143.9	3.97	107.4	8.95	2	374.571	1.02079	1							5.04
36	70	2	2023-03-08	04:40:00	90	36	54	130	77	16		1	1				1	106	13.9	432	14.16	37	26	20	1.3	138	4.9	117	10	2	416.577	0.998301	1		1					9
37	71	1	2023-04-17	23:00:00	380	36.1	95	130	85	18	1	1					1	271	13,8	313	11,18	19	10	24,4	0,87	135	4,94	101	9,9	2	455.886	1.42916		1						16
38	72	1	2023-04-28	10:00:00	520	36	100	118	74	24							1	140	14,2	229	14,2	21	10	22,3	0,73	140	4,39	104	9,84	2	402.104	1.08715			1		1			140
39	74	1	2023-01-05	09:45:00	185	36.3	95	134	82	17	1	1					1	184	13.4	339	11	19	13	20	0.6	134	4	112	9.7	2	464.567	1.83734	1			1				2.4
40	47	2	99	99	99	36.8	88	123	74	16								152	14.6	230	7.36	29.4	26.4	16.5	0.59	143.6	3.65	99.3	8.96	99	365.229	0.807972
41	50	2	99	99	99	36.7	84	127	75	15								114	13.5	259	6.96	27.6	32.5	9.45	0.46	139.5	3.76	100.6	9.12	99	719.354	2.20817
42	54	2	99	99	99	36.4	76	114	72	14								98	12.6	241	12.6	34.5	31.6	23.6	0.62	136	4.59	106.4	9.95	99	260.882	0.50341
43	56	2	99	99	99	36.7	74	109	69	13								86	13.2	267	9.54	30.1	30.1	20.4	0.67	140.9	4.32	95	8.94	99	294.7	1.14868
44	60	1	99	99	99	36.6	79	120	68	18								145	15.6	328	10.4	27.4	36.4	16.4	0.69	137.4	4.21	96.3	9.1	99	356.248	1.20862
45	60	2	99	99	99	36.5	85	104	59	17								126	11	316	16.4	23.9	26.3	13.4	0.74	135.2	5.06	105.4	9.69	99	239.842	1.39884
46	63	1	99	99	99	36.6	82	126	75	16								159	12.5	342	6.89	22.4	42.3	23.1	0.65	136.4	3.96	104.6	10.4	99	441.178	0.84918
47	60	2	99	99	99	36.7	83	119	69	16								147	11.7	209	5.69	20.9	34.1	18.4	0.54	143.1	4.16	98.6	10.3	99	323.137	1.13906
48	64	2	99	99	99	36.8	79	106	58	15								129	13.6	294	8.54	26.7	26.5	12.6	0.84	134.9	4.56	101.6	9.23	99	383.656	1.61598
49	60	2	99	99	99	36	72	129	71	15								110	14.3	346	7.63	34.6	29.4	11.9	0.86	138.6	4.23	105.7	9.46	99	599.681	1.56119
50	67	2	99	99	99	36.9	70	116	64	12								109	12.4	234	7.69	26.4	23.1	16.4	0.94	139.6	5.2	106.5	9.12	99	750.152	1.7084
51	64	1	99	99	99	36.4	78	124	75	18								138	15.8	236	8.54	23.4	25.6	18.4	0.74	134.2	3.63	100.7	8.69	99	502.941	0.795503
52	67	2	99	99	99	36.3	86	106	58	17								142	13.4	326	9.45	25.9	20.9	16.2	1.25	136	3.94	106.5	9.56	99	360.001	0.970955
53	67	2	99	99	99	36.5	94	123	74	17								96	10.4	316	9.12	26.4	34.1	20.4	1.64	142.6	4.63	107	8.96	99	236.574	0.452009
54	68	1	99	99	99	36.6	97	125	76	16								106	12.4	394	10.6	39.7	31.9	14.4	0.53	140	4.95	103.5	8.76	99	329.367	0.646078
55	69	2	99	99	99	36.3	93	121	68	15								174	13.4	320	6.59	24.6	23.4	13.5	0.53	137	3.65	102.6	8.62	99	549.181	2.90901
56	71	2	99	99	99	36.4	92	112	69	19								163	14.7	308	7.69	28.7	20.9	12.9	0.95	137.6	3.95	100.9	9.12	99	431.238	1.60459
57	73	1	99	99	99	36.4	76	116	64	15								116	10.6	314	7.12	23.4	39.4	26.1	1.54	136.5	4.52	97.6	10.3	99	403.813	1.35984
58	73	1	99	99	99	36.5	83	126	78	15								109	13.8	298	8.58	29.4	21.9	23.7	1.95	139.2	3.69	103.1	10.4	99	1474.59	5.90951
59	51	2	99	99	99	36.3	84	129	69	15								135	13.5	283	10.4	43.1	23.8	29.1	0.6	135.1	4.96	104.9	9.23	99	415.031	1.12668
60	58	2	99	99	99	36.5	74	120	63	24								176	14.3	289	13.12	27.1	20.4	19.2	0.95	138.7	4.12	176	9.36	99	338.07	1.53858
61	58	2	99	99	99	36	69	136	80	22								100	13.2	253	8.44	35	16.3	17.5	0.93	135.8	4.4	103.5	8.67	99	415.803	1.88776
62	74	1	99	99	99	36	98	114	50	24								118	15.4	399	11.5	91.5	56.2	12.6	0.81	136.9	4.68	105.7	9.08	99	379.912	1.33542
63	74	1	99	99	99	36.4	74	123	63	13								98	13.9	361	7.36	35.6	25.6	19.4	0.95	136.4	3.98	100.2	9.56	99	281.09	0.874777
64	74	1	99	99	99	36.9	69	115	74	16								106	14.5	294	6.23	24.7	34.1	18.5	0.68	139.4	4.12	103.4	8.51	99	1199.52	4.30805
65	30	1	99	99	99	36.7	84	127	75	15								126	11	316	16.4	23.9	26.3	13.4	0.74	135.2	5.06	105.4	9.69	99	1055.26	4.12037
66	49	1	99	99	99	36.6	79	120	68	18								129	13.6	294	8.54	26.7	26.5	12.6	0.84	134.9	4.56	101.6	9.23	99	262.059	1.12147
67	52	2	99	99	99	36.8	79	106	58	15								142	13.4	326	9.45	25.9	20.9	16.2	1.25	136	3.94	106.5	9.56	99	495.638	2.45342
68	75	1	99	99	99	36.5	94	123	74	17								128	13.9	306	8.42	26.1	34.9	23.4	1.56	139.4	4.03	106.1	10.8	99	374.222	0.925679
69	75	2	99	99	99	36.6	97	125	76	16								116	10.6	314	7.12	23.4	39.4	26.1	1.54	136.5	4.52	97.6	10.3	99	366.476	0.643403
70	77	1	99	99	99	36.3	93	121	68	15								109	12.4	234	7.69	26.4	23.1	16.4	0.94	139.6	5.2	106.5	9.12	99	676.15	2.3839
71	78	2	99	99	99	36.4	92	112	69	19								138	15.8	236	8.54	23.4	25.6	18.4	0.74	134.2	3.63	100.7	8.69	99	442.143	0.781027
72	78	2	99	99	99	36.9	84	117	59	14								142	13.4	326	9.45	25.9	20.9	16.2	1.25	136	3.94	106.5	9.56	99	2051.53	9.40525
73	78	2	99	99	99	36.4	76	116	64	15								96	10.4	316	9.12	26.4	34.1	20.4	1.64	142.6	4.63	107	8.96	99	272.655	1.07955
74	73	1	99	99	99	36.7	83	119	69	16								128	13.9	306	8.42	26.1	34.9	23.4	1.56	139.4	4.03	106.1	10.8	99	276.868	0.709778
75	75	1	99	99	99	36	72	129	71	15								147	11.7	209	5.69	20.9	34.1	18.4	0.54	143.1	4.16	98.6	10.3	99	242.905	4.03932
76	82	2	99	99	99	36.9	70	116	64	12								129	13.6	294	8.54	26.7	26.5	12.6	0.84	134.9	4.56	101.6	9.23	99	423.8	1.49464
77	83	1	99	99	99	36.4	78	124	75	18								110	14.3	346	7.63	34.6	29.4	11.9	0.86	138.6	4.23	105.7	9.46	99	375.818	1.11057
78	67	2	99	99	99	36.4	78	124	75	18								174	13.4	320	6.59	24.6	23.4	13.5	0.53	137	3.65	102.6	8.62	99	659.288	1.5998
79	86	1	99	99	99	36.6	74	136	8	14								152	12.7	231	10.4	31.5	34.9	25.4	0.84	146	4.1	104.2	9.41	99	1291.31	4.08848
